# Supplementary material
Source: PubMed Central journal article supplement (PMC3181340)

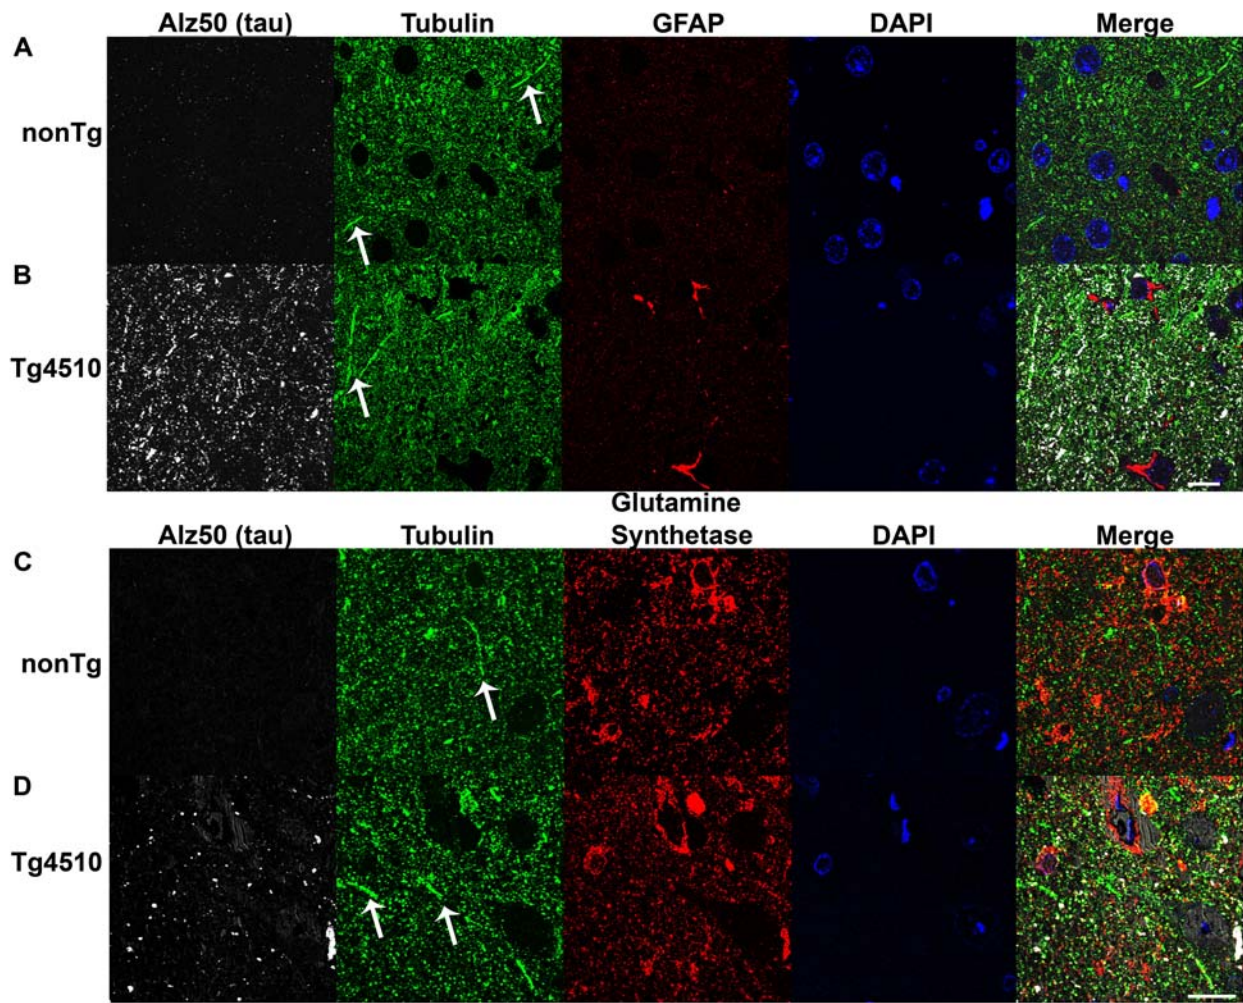

Supplement: mmc2.pdf [file mmc2.pdf]
